# Supplementary material for: Determinants of the postprandial triglyceride response to a high-fat meal in healthy overweight and obese adults
Source: PubMed Central journal article supplement (PMC8451105; doi:10.1186/s12944-021-01543-4), 2021-09-20
Supplement: 12944_2021_1543_MOESM1_ESM.pdf [file 12944_2021_1543_MOESM1_ESM.pdf]

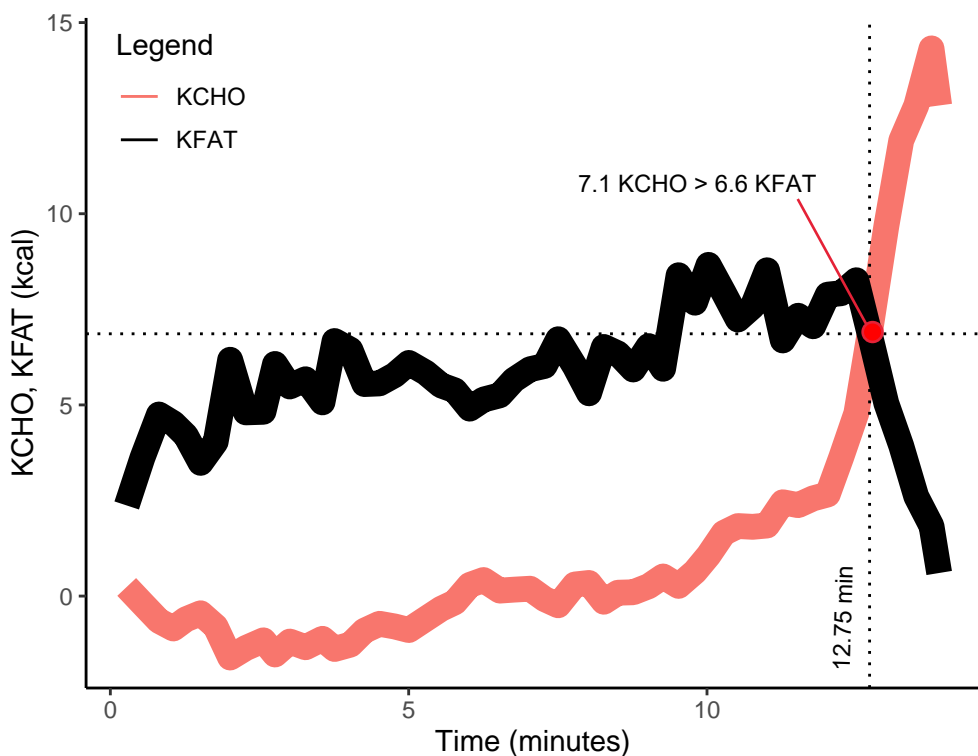

### Example determination of Crossover Percentage

Data in this example is from one female participant.

Time at which  $KCHO > KFAT = 12.75$  minutes

$VO_2/kg$  at 12.75 minutes = 35.54 ml/kg/min

Crossover  $VO_2$  / Calculated absolute  $VO_2$  max = % of  $VO_2$  max at crossover  
(ie, Crossover %)

$35.54 \text{ ml/kg/min} / 50.72 \text{ ml/kg/min} = \underline{68.1\%}$
