# Supplementary material for: Determinants of the postprandial triglyceride response to a high-fat meal in healthy overweight and obese adults
Source: PubMed Central journal article supplement (PMC8451105; doi:10.1186/s12944-021-01543-4), 2021-09-20

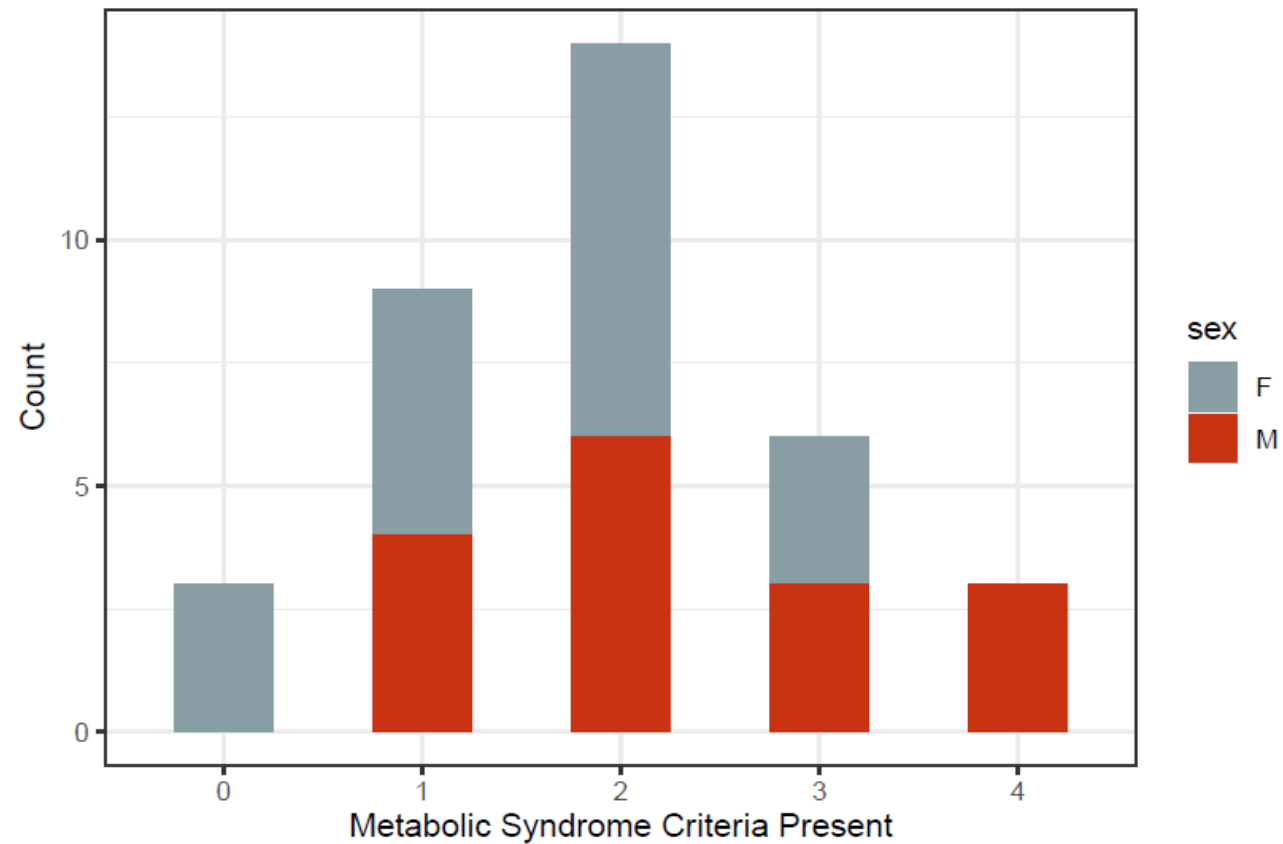

Supplement: 12944_2021_1543_MOESM2_ESM.pdf [file 12944_2021_1543_MOESM2_ESM.pdf]
