# Supplementary material for: Determinants of the postprandial triglyceride response to a high-fat meal in healthy overweight and obese adults
Source: PubMed Central journal article supplement (PMC8451105; doi:10.1186/s12944-021-01543-4), 2021-09-20
Supplement: 12944_2021_1543_MOESM3_ESM.pdf [file 12944_2021_1543_MOESM3_ESM.pdf]

|      | <b>Age</b>   | <b>Sex</b>   | <b>Crossover</b> | <b>VAT</b> | <b>HOMA1R</b> | <b>Aerobic</b> | <b>SBP</b>   | <b>DBP</b>   | <b>R<sup>2</sup><sub>adj</sub></b> |
|------|--------------|--------------|------------------|------------|---------------|----------------|--------------|--------------|------------------------------------|
| Full | 0.671        | 0.797        | 0.004            | 0.117      | 0.043         | 0.058          | 0.555        | <b>0.807</b> | 0.195                              |
| D1   | 0.704        | <b>0.843</b> | 0.042            | 0.101      | 0.041         | 0.052          | 0.474        | NA           | 0.223                              |
| D2   | <b>0.727</b> | NA           | 0.033            | 0.015      | 0.037         | 0.048          | 0.478        | NA           | 0.249                              |
| D3   | NA           | NA           | 0.032            | 0.011      | 0.032         | 0.046          | <b>0.518</b> | NA           | 0.272                              |
| D4*  | NA           | NA           | 0.036            | 0.013      | 0.037         | <b>0.054</b>   | NA           | NA           | 0.286                              |
| D5   | NA           | NA           | 0.090            | 0.050      | 0.083         | NA             | NA           | NA           | 0.217                              |

\*Final model. Abbreviations: DBP, diastolic blood pressure; HOMA1R, homeostatic model of insulin resistance; SBP, systolic blood pressure; VAT, visceral adipose tissue.
