# Supplementary material for: Determinants of the postprandial triglyceride response to a high-fat meal in healthy overweight and obese adults
Source: PubMed Central journal article supplement (PMC8451105; doi:10.1186/s12944-021-01543-4), 2021-09-20
Supplement: 12944_2021_1543_MOESM4_ESM.pdf [file 12944_2021_1543_MOESM4_ESM.pdf]

|      | <b>Age</b>   | <b>Sex</b>   | <b>Crossover</b> | <b>VAT</b> | <b>HOMAIR</b> | <b>Aerobic</b> | <b>SBP</b>   | <b>DBP</b>   | <b>R<sup>2</sup><sub>adj</sub></b> |
|------|--------------|--------------|------------------|------------|---------------|----------------|--------------|--------------|------------------------------------|
| Full | <b>0.820</b> | 0.524        | 0.046            | 0.052      | 0.150         | 0.019          | 0.546        | 0.809        | 0.242                              |
| D1   | NA           | 0.543        | 0.042            | 0.034      | 0.132         | 0.017          | 0.569        | <b>0.751</b> | 0.269                              |
| D2   | NA           | <b>0.475</b> | 0.037            | 0.032      | 0.123         | 0.011          | 0.139        | NA           | 0.292                              |
| D3*  | NA           | NA           | 0.046            | <0.001     | 0.141         | 0.012          | <b>0.182</b> | NA           | 0.304                              |
| D4   | NA           | NA           | 0.075            | 0.002      | <b>0.279</b>  | 0.023          | NA           | NA           | 0.283                              |

\*Final model. Abbreviations: DBP, diastolic blood pressure; HOMAIR, homeostatic model of insulin resistance; SBP, systolic blood pressure; VAT, visceral adipose tissue.
