# Supplementary material for: Determinants of the postprandial triglyceride response to a high-fat meal in healthy overweight and obese adults
Source: PubMed Central journal article supplement (PMC8451105; doi:10.1186/s12944-021-01543-4), 2021-09-20
Supplement: 12944_2021_1543_MOESM5_ESM.pdf [file 12944_2021_1543_MOESM5_ESM.pdf]

| Model                                 | Coefficient | F-statistic | p-value |
|---------------------------------------|-------------|-------------|---------|
| $\widehat{TG}_{iAUC}$                 |             |             |         |
| Crossover <sup>1</sup> (%)            | 0.05        | 4.80        | 0.04    |
| VAT (L)                               | 0.53        | 7.05        | 0.01    |
| HOMA-IR                               | 0.30        | 4.78        | 0.04    |
| Aerobic Frequency <sup>2</sup> (d/wk) | 0.31        | 4.00        | 0.05    |
| $\widehat{TG}_{(peak-fast)}$          |             |             |         |
| Crossover (%)                         | 0.02        | 4.36        | 0.05    |
| VAT (L)                               | 0.43        | 14.0        | <0.01   |
| HOMA-IR                               | 0.12        | 2.30        | 0.14    |
| Aerobic Frequency (d/wk)              | 0.23        | 7.15        | 0.01    |
| SBP (mmHg)                            | 0.02        | 1.87        | 0.18    |

<sup>1</sup>Crossover indicates the percentage of VO<sub>2</sub> max during a submaximal exercise test where carbohydrate (versus fat) became the dominant substrate utilized.

<sup>2</sup>Aerobic frequency indicates the self-reported number of days where participants completed aerobic exercise in last 7 days.

Abbreviations: maximal oxygen consumption, VO<sub>2</sub>; visceral adipose tissue, VAT; homeostatic model of insulin resistance, HOMA-IR; systolic blood pressure, SBP.
